# Supplementary material for: Nanoscale assembly of mesoporous ZnO: A potential drug carrier
Source: Royal Society of Chemistry journal article supplement (doi:10.1039/c0jm00022a), 2010-01-01
Supplement: c0jm00022a.pdf [file c0jm00022a.pdf]

## Electronic Supplementary Information (ESI)

### Nanoscale Assembly of Mesoporous ZnO: A Potential Drug Carrier

K. C. Barick, Saumya Nigam and D. Bahadur\*

Department of Metallurgical Engineering and Materials Science,  
Indian Institute of Technology Bombay, Powai, Mumbai – 400 076, India

\*Corresponding author:- Email: dhirenb@iitb.ac.in, Phone No. + 91-22-2576 7632, Fax No. + 91-22-2582 3480

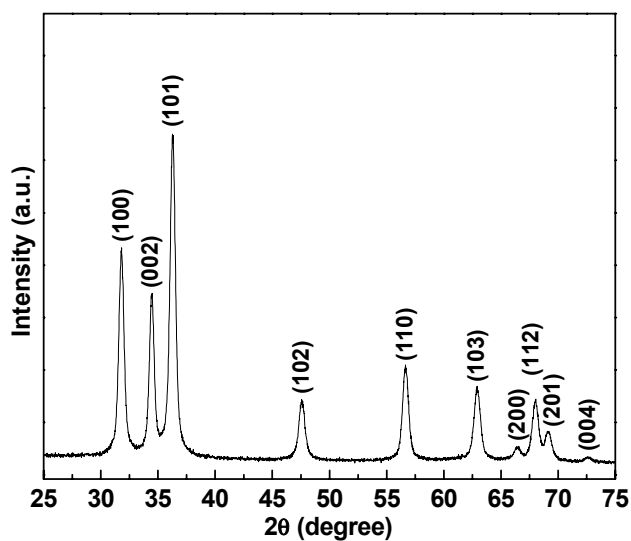

Fig. S1. XRD pattern of ZnO nanoassemblies.

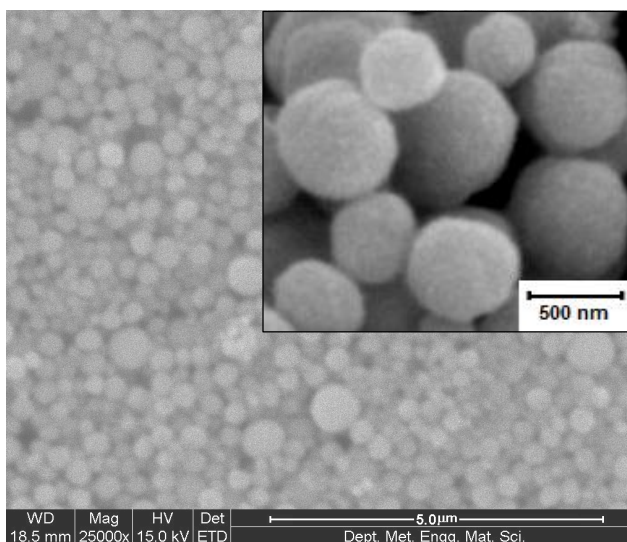

Fig. S2. Large scale SEM micrograph of ZnO nanoassemblies (inset clearly shows that nanoassemblies are comprised of numerous fine nanocrystals).

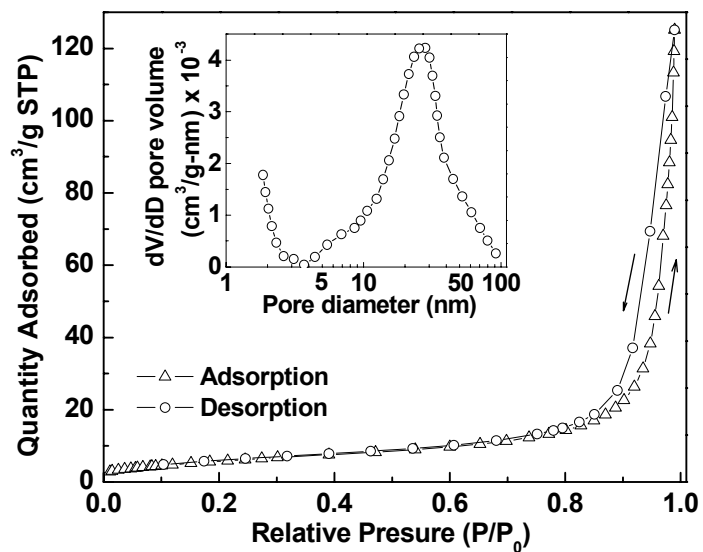

Fig. S3. N<sub>2</sub> adsorption-desorption isotherm of ZnO nanoassemblies (inset shows its BJH desorption dV/dD pore volume vs. pore diameter curve).

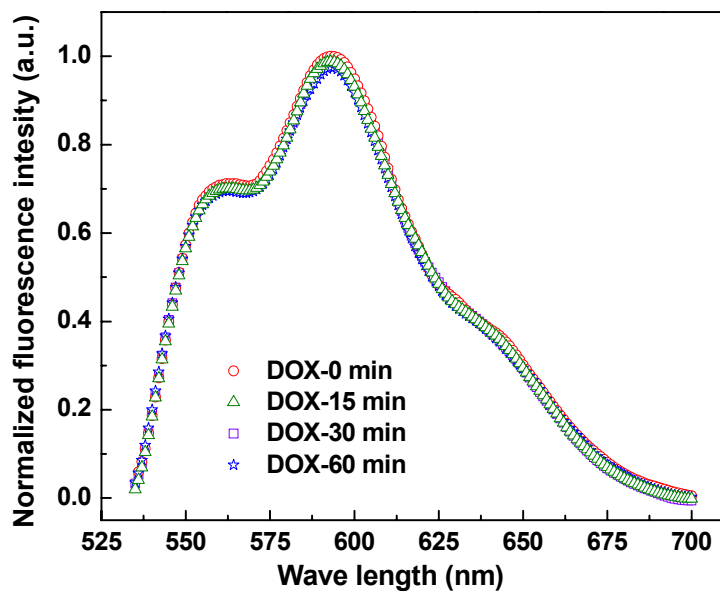

Fig. S4. Fluorescence spectra of pure DOX (10 µg/ml) at different interval of time (self-quenching of DOX is not observed during experiment, i.e. loading of DOX into ZnO nanoassemblies).

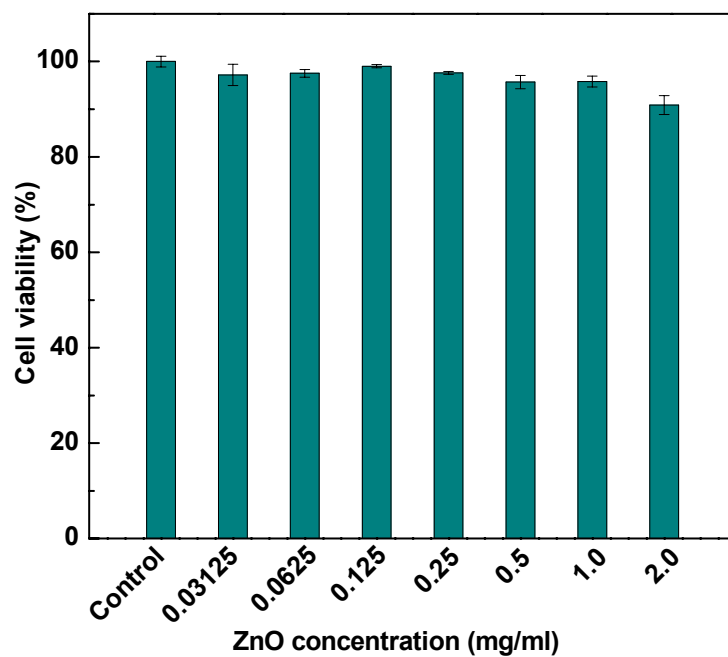

Fig. S5. Percentage viability of HeLa cells after 24 h incubation of ZnO nanoassemblies (control: viability of HeLa cells without ZnO nanoassemblies). The results are shown as mean  $\pm$  standard deviation ( $n = 4$ ).

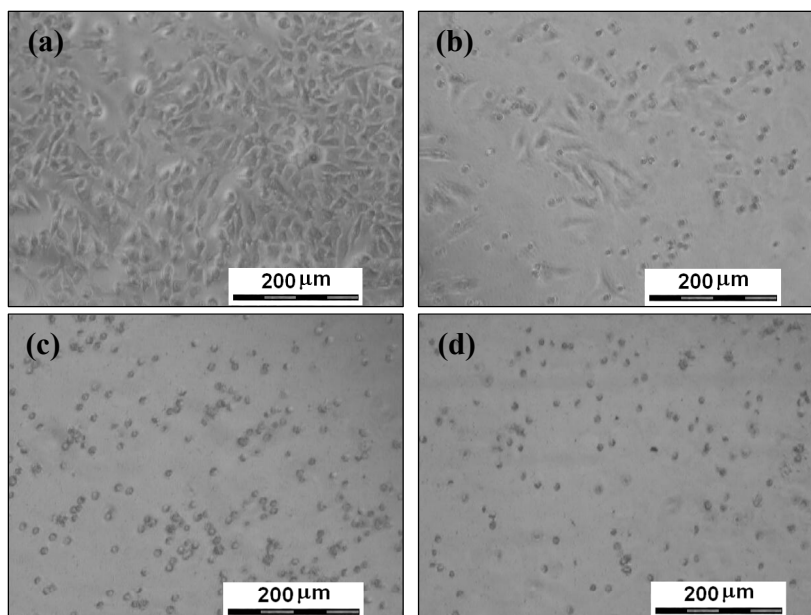

Fig. S6. Representative photographs of HeLa cells for (a) 0.0  $\mu\text{M}$  DOX (control), (b) 0.125  $\mu\text{M}$  of DOX, (c) 1.0  $\mu\text{M}$  of DOX and (d) 2.0  $\mu\text{M}$  of DOX in DOX loaded ZnO.

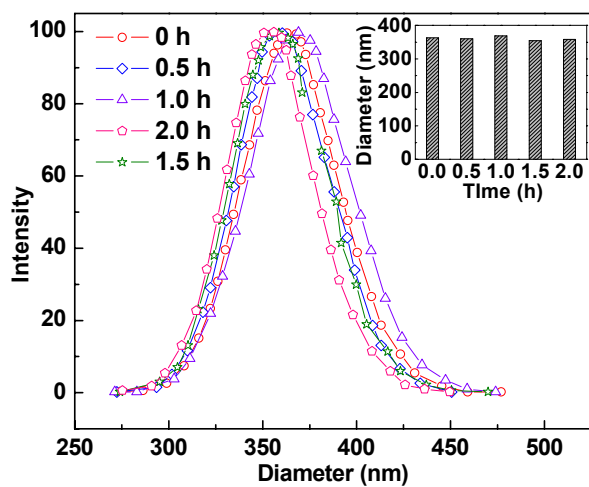

Fig. S7. DLS measurements showing the hydrodynamic diameter of ZnO colloids. Inset shows the corresponding column plot.
